# Supplementary material
Source: PubMed Central journal article supplement (PMC7153167)
Supplement: NIHMS1570165-supplement-Supplemental_material.pdf [file NIHMS1570165-supplement-Supplemental_material.pdf]

## Supporting Information

Coupling Headgroup and Alkene Specific Solution Modifications with Gas-Phase Ion/Ion Reactions for Sensitive Phospholipid Identification and Characterization

Elissia T. Franklin<sup>a</sup>, Samuel W. J. Shields<sup>b</sup>, Jeffrey C. Smith<sup>b</sup>, Yu Xia<sup>a,c</sup>, Scott A. McLuckey<sup>a\*</sup>

*a. Department of Chemistry, Purdue University, 560 Oval Drive, West Lafayette, IN, United States, 47907-2084, West Lafayette, IN, United States 47907-2084*

*b. Department of Chemistry and Institute of Biochemistry, Carleton University, 203 Steacie Building, 1125 Colonel By Drive, Ottawa, Ontario K1S 5B6, Canada*

*c. Department of Chemistry, Tsinghua University, Mengminwei Technical Building, Beijing, Haidian, China, 100084*

\*Email: [mcluckey@purdue.edu](mailto:mcluckey@purdue.edu)

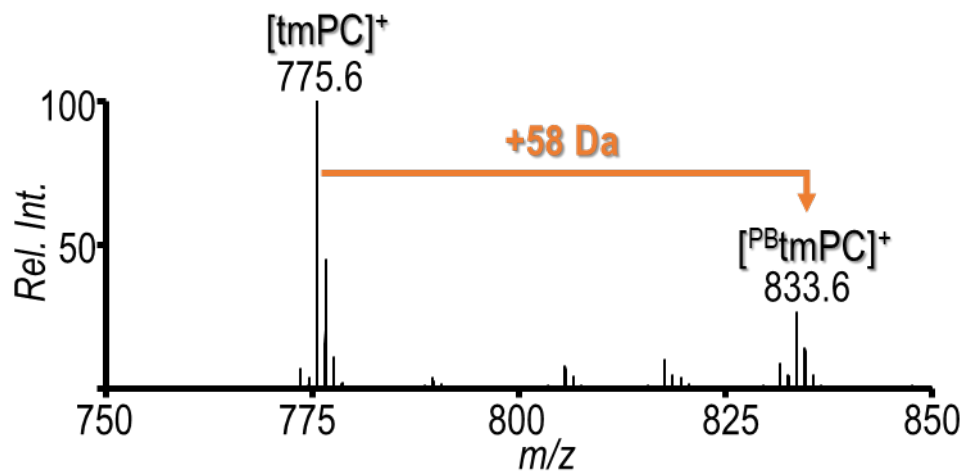

**Figure S1:** Positive ion mode mass spectrum of the PB reaction of [tmPC 16:0/18:1(9Z)]<sup>+</sup>.

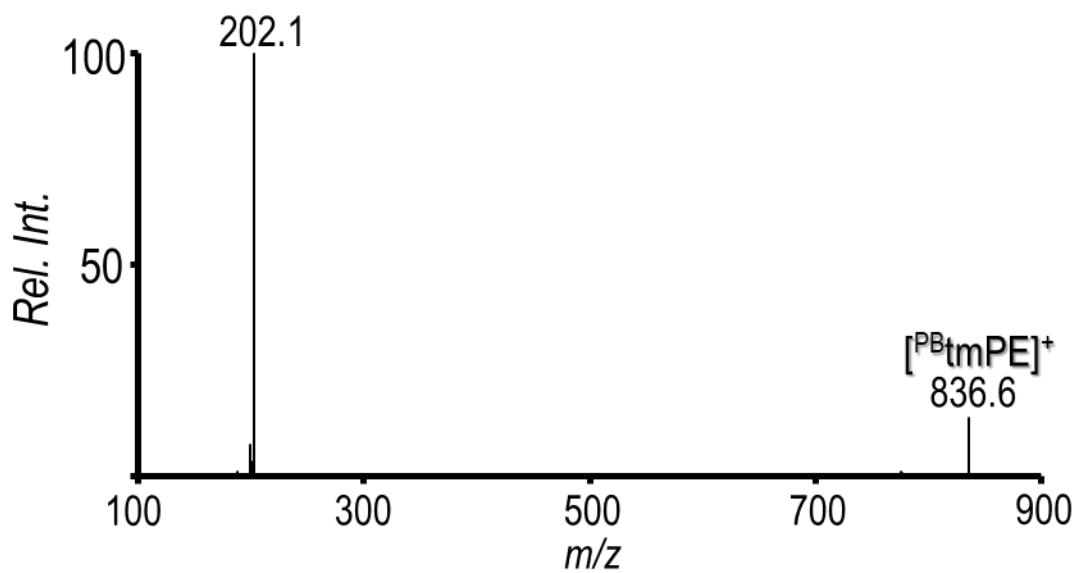

**Figure S2:** Positive ion mode CID spectrum of [<sup>PB</sup>tmPE 16:0/18:1(9Z)]<sup>+</sup>.

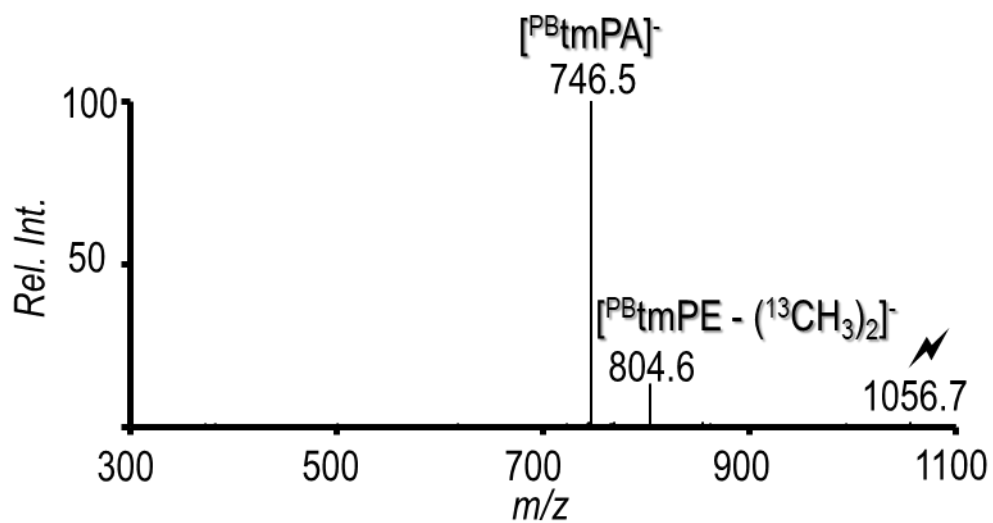

**Figure S3:** Isolation and sequential charge inversion of the PB product of positive ions at  $m/z$  778 followed by CID of  $[\text{PBtmPE} + \text{PDPA} - 2\text{H}]^-$  at  $m/z$  1056.7 from bovine liver polar lipid extract.

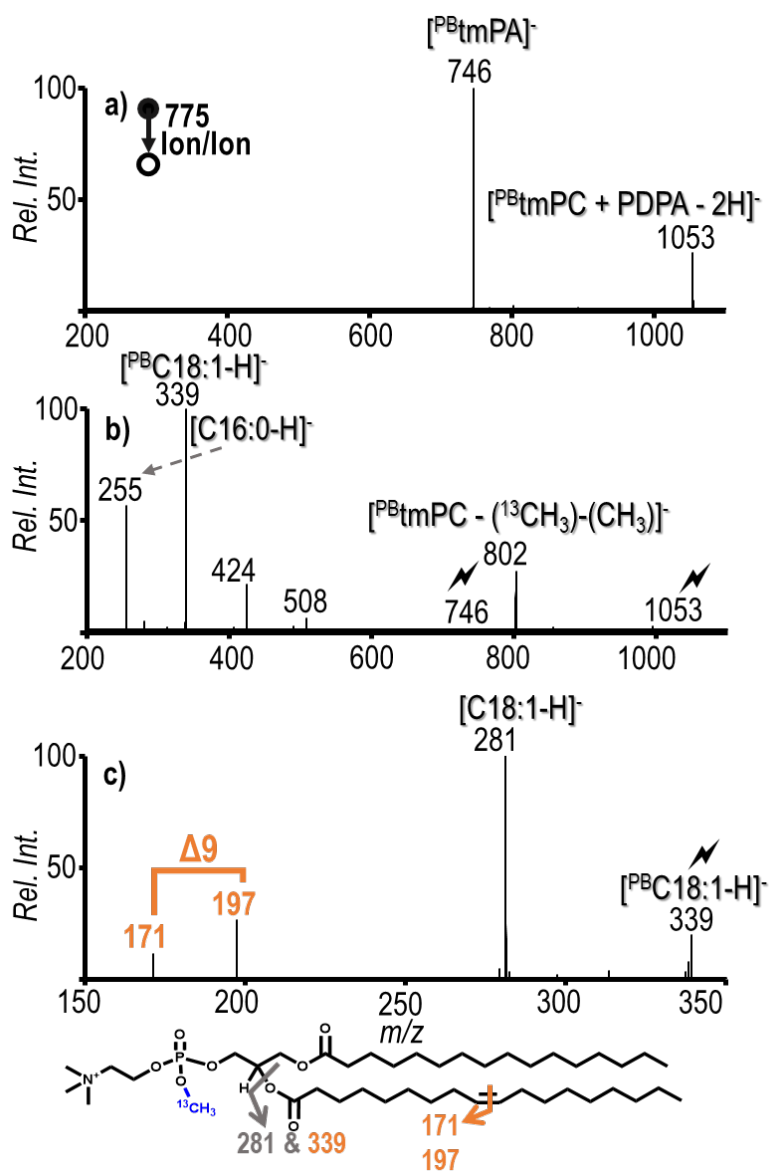

**Figure S4:** a) Post-ion/ion reaction between  $[PDPA - 2H]^{2-}$  and  $[^{PB}tmPC\ 16:0/18:1(9Z)]^+$ ; b) Ion trap CID of  $[^{PB}tmPC + PDPA - 2H]^-$  followed by subsequent ion trap CID of  $[^{PB}tmPA]^-$ ; c) Sequential steps of CID for the C=C localization.

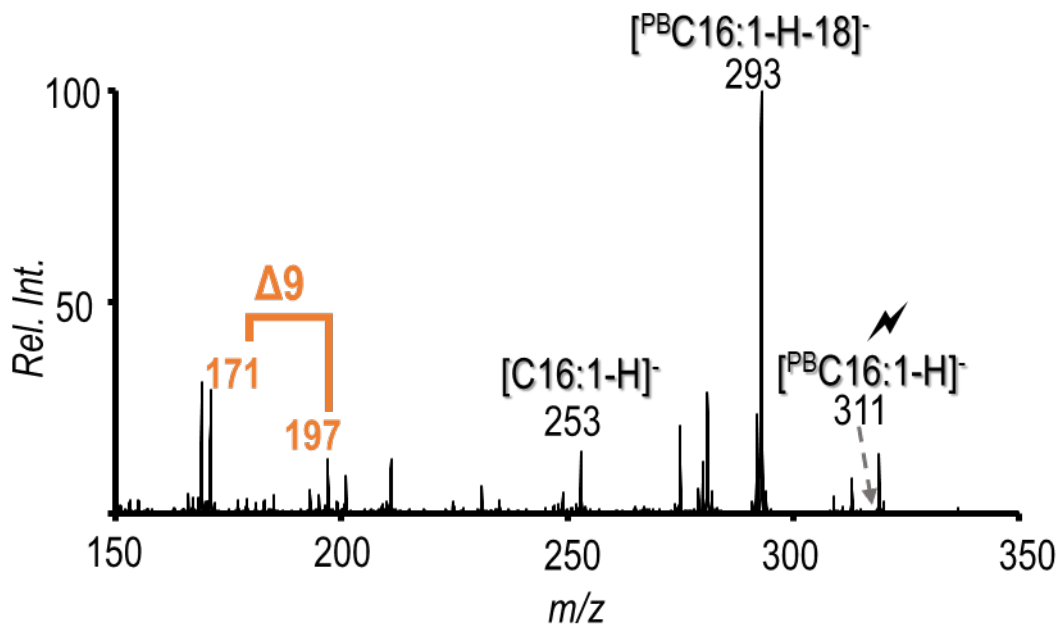

**Figure S5:** Charge inversion of positive ion mode  $m/z$  836 (PB product of  $m/z$  778) followed by multiple steps of ion trap CID and sequential CID spectrum of  $m/z$  311.

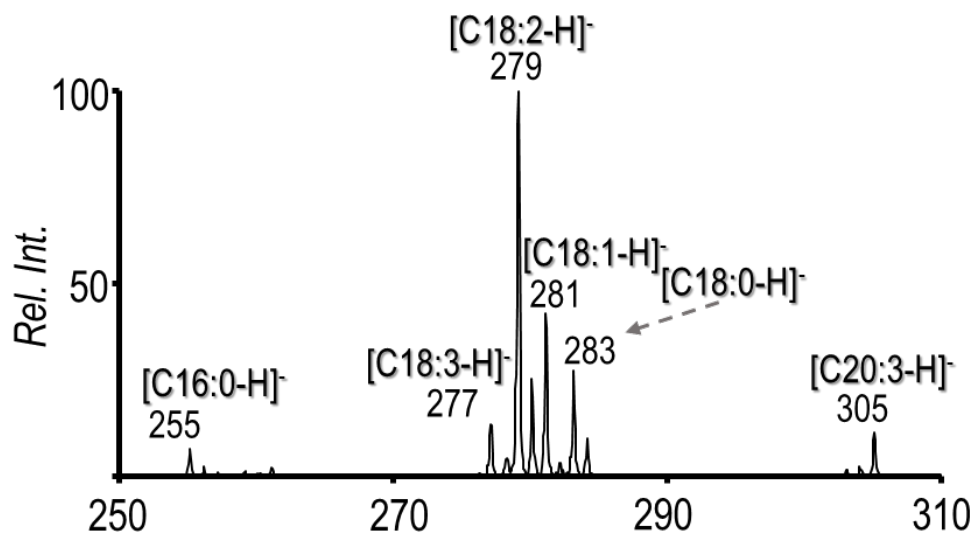

**Figure S6:** Charge inversion via ion/ion reaction with PDPA of ions at  $m/z$  802 followed by sequential steps of CID for fatty chain determination.
